# Supplementary material
Source: publisher figshare collection journal article supplement (https://sage.figshare.com/ndownloader/files/17709857)
Supplement: Supplementary file 1 [file 17709857]

## Appendix 2.Summary of findings for pain intensity

### Acupuncture compared to sham or placebo acupuncture for non-specific LBP

**Patient or population:** patients with low back pain

**Intervention:** acupuncture

**Comparison:** sham or placebo acupuncture

| Outcomes                                                            | Illustrative comparative risks* (95% CI)                                                                  |                                                                                                                                                                | Relative No of effect (95% CI) | Participants evidence (studies)         | Quality of the Comments (GRADE) |
|---------------------------------------------------------------------|-----------------------------------------------------------------------------------------------------------|----------------------------------------------------------------------------------------------------------------------------------------------------------------|--------------------------------|-----------------------------------------|---------------------------------|
|                                                                     | Assumed risk                                                                                              | Corresponding risk                                                                                                                                             |                                |                                         |                                 |
|                                                                     | Sham acupuncture                                                                                          | Acupuncture                                                                                                                                                    |                                |                                         |                                 |
| <b>Pain intensity-Post intervention - acute/subacute LBP</b><br>VAS | The mean pain intensity-post intervention - acute/subacute lbp in the control groups was<br><b>3-52.5</b> | The mean pain intensity-post intervention - acute/subacute lbp in the intervention groups was<br><b>0.54 standard deviations lower</b><br>(0.87 to 0.22 lower) | 156<br>(3 studies)             | ⊕ ⊕ ⊕ ⊖<br><b>moderate</b> <sup>1</sup> | SMD -0.54 (-0.87 to -0.22)      |
| <b>Pain intensity-Post intervention - Chronic LBP</b><br>VAS        | The mean pain intensity-post intervention - chronic lbp in the control groups was<br><b>1-61.7</b>        | The mean pain intensity-post intervention - chronic lbp in the intervention groups was<br><b>0.35 standard deviations lower</b><br>(0.55 to 0.14 lower)        | 597<br>(6 studies)             | ⊕ ⊕ ⊕ ⊖<br><b>moderate</b> <sup>2</sup> | SMD -0.35 (-0.55 to -0.14)      |
| <b>Pain intensity-Follow-up - Chronic LBP</b><br>VAS<br>Follow-up:  | The mean pain intensity-follow up - chronic lbp in the control groups was<br><b>4.06-50.1</b>             | The mean pain intensity-follow-up - chronic lbp in the intervention groups was<br><b>1.44 lower</b><br>(2.26 to 0.63 lower)                                    | 431<br>(4 studies)             | ⊕ ⊕ ⊕ ⊖<br><b>moderate</b> <sup>3</sup> | SMD -0.41 (-0.84 to 0.01)       |
| <b>Pain intensity-Follow-up - acute/subacute LBP</b>                | The mean pain intensity-post intervention - chronic lbp in the control groups was                         | The mean pain intensity-follow-up - acute/subacute lbp in the intervention groups was                                                                          | 40<br>(1 study)                | ⊕ ⊕ ⊕ ⊖<br><b>moderate</b> <sup>4</sup> | SMD -0.66 (-1.30 to -0.02)      |

|            |      |                       |
|------------|------|-----------------------|
| VAS        | 51.7 | 18.4 lower            |
| Follow-up: |      | (35.37 to 1.43 lower) |

\*The basis for the **assumed risk** (e.g. the median control group risk across studies) is provided in footnotes. The **corresponding risk** (and its 95% confidence interval) is based on the assumed risk in the comparison group and the **relative effect** of the intervention (and its 95% CI).

**CI:** Confidence interval;

GRADE Working Group grades of evidence

**High quality:** Further research is very unlikely to change our confidence in the estimate of effect.

**Moderate quality:** Further research is likely to have an important impact on our confidence in the estimate of effect and may change the estimate.

**Low quality:** Further research is very likely to have an important impact on our confidence in the estimate of effect and is likely to change the estimate.

**Very low quality:** We are very uncertain about the estimate.

<sup>1</sup> Two studies(Inoue 2006 and Kennedy 2008) with unclear registration information and one of them( Kennedy 2008) without protocol.

<sup>2</sup> One study (Brikhaus.B.2006) with unclear allocation concealment and performance bias.

<sup>3</sup> One study with unclear registration information.
